# Supplementary material
Source: publisher site journal article supplement (https://www.dovepress.com/article/291164)
Supplement: Supplementary file 1 [file get_supplementary_file.php]

**Supplementary Table S1.** Characteristics of patients with ischemic stroke according to initial clinical severity.

|  | **Minor stroke (NIHSS score**  **0–2), n = 83** | **Mild stroke (NIHSS score**  **3–5), n = 113** | **Moderate stroke (NIHSS score**  **6–10), n = 56** | **Severe stroke (NIHSS score**  **>10), n = 53** | ***P*-value** |
| --- | --- | --- | --- | --- | --- |
| Age, mean ± SD | 68.48±12.12 | 68.12±11.11 | 68.80±12.21 | 74.76±11.42 | 0.003 |
| Sex, male (%) | 59(71.1) | 72(63.7) | 38(67.9) | 29(54.7) | 0.252 |
| BMI (kg/m2), mean ± SD | 24.38±3.95 | 24.81±3.37 | 24.13±2.76 | 24.17±3.22 | 0.488 |
| Education, median (IQR) | 5(0, 8) | 5(3, 8) | 5(0.5, 7.5) | 5(0, 8) | 0.568 |
| Live alone (%) | 8(9.6) | 7(6.2) | 6(10.7) | 2(3.8) | 0.439 |
| Vascular risk factors |  |  |  |  |  |
| Smoking, n (%) | 37(44.6) | 42(37.2) | 24(42.9) | 20(37.7) | 0.708 |
| Drinking, n (%) | 33(39.8) | 45(39.8) | 21(37.5) | 16(30.2) | 0.650 |
| Hypertension, n (%) | 62(74.7) | 92(81.4) | 36(64.3) | 36(67.9) | 0.071 |
| Diabetes, n (%) | 21(25.3) | 36(31.9) | 24(42.9) | 14(26.9) | 0.140 |
| Atrial fibrillation, n (%) | 10(12.0) | 14(12.4) | 8(14.3) | 23(43.4) | 0.000 |
| Previous stroke, n (%) | 17(20.5) | 17(15.0) | 14(25) | 18(34.0) | 0.044 |
| Laboratory data |  |  |  |  |  |
| Insulin, mU/L, median (IQR) | 7.3(4.5, 10.4) | 7.9(4.5, 11.2) | 8.2(5.2, 12.5) | 8.8(6.0, 12.3) | 0.086 |
| FBG, mmol/L, median (IQR) | 5.7(4.9, 7.1) | 5.5(4.5, 6.8) | 5.7(5.0, 6.9) | 6.0(5.4, 9.3) | 0.044 |
| HOMA-IR, median (IQR) | 2.1(1.2, 2.9) | 2.1(1.1, 3.2) | 2.3(1.4, 3.2) | 2.9(2.0, 3.8) | 0.004 |
| HbA1c, %, median (IQR) | 6.1(5.8, 6.7) | 6.3(5.8, 7.1) | 6.3(5.9, 6.8) | 6.7(6.0, 8.1) | 0.048 |
| HCY, μmol/L, median (IQR) | 13.4(10.5, 14.9) | 13.6(11.5, 17.1) | 13.1(11.3, 17.5) | 14.3(11.3, 19.6) | 0.282 |
| Hs-CRP, mg/L, median (IQR) | 1.5(0.5, 6.4) | 2.9(0.7, 11.6) | 3.5(1.2, 12.5) | 4.4(1.0, 18.0) | 0.068 |
| FT3, pmol/L, median (IQR) | 4.4(4.2, 4.8) | 4.4(4.1, 4.8) | 4.3(4.0, 4.9) | 4.4(3.9, 4.6) | 0.364 |
| TC, mmol/L, median (IQR) | 4.2(3.5, 4.8) | 4.3(3.7, 5.1) | 4.5(3.7, 5.1) | 4.3(3.8, 5.0) | 0.341 |
| TG, mmol/L, median (IQR) | 1.5(1.0, 2.2) | 1.6(1.0, 2.2) | 1.5(1.0, 2.0) | 1.7(1.1, 2.4) | 0.725 |
| HDL-C, mmol/L, mean ± SD | 1.13±0.27 | 1.10±0.24 | 1.12±0.24 | 1.08±0.27 | 0.641 |
| LDL-C, mmol/L, mean ± SD | 2.51±0.93 | 2.78±0.97 | 2.84±0.91 | 2.84±0.79 | 0.021 |
| IL-1β, pg/mL, median (IQR) | 38.1(26.0, 52.7) | 38.2(29.3, 48.7) | 42.9(33.2, 51.0) | 46.7(37.6, 59.9) | 0.008 |
| Location |  |  |  |  | 0.865 |
| Left side, n (%) | 40(48.2) | 51(45.1) | 25(44.6) | 24(45.3) |  |
| Right side, n (%)  Bilateral, n (%) | 35(42.2)  8(9.6) | 41(40.7)  16(14.2) | 23(41.1)  8(14.3) | 19(35.8)  10(18.9) |  |
| Neuropsychological function |  |  |  |  |  |
| NIHSS score, median (IQR) | 1(1, 2) | 4(3, 4) | 8(6, 9) | 15(12, 21) | 0.000 |
| BI score, median (IQR) | 95(90, 100) | 80(65, 90) | 50(40, 70) | 20(2, 35) | 0.000 |
| mRS score, median (IQR) | 1(0, 2) | 2(1, 3) | 3(2, 4) | 5(4, 6) | 0.000 |
| MMSE score, median (IQR) | 16(22, 27) | 24(18, 27) | 22(16, 25) | 18(12, 21) | 0.000 |
| HAMA score, median (IQR) | 4(2, 7) | 4(2, 6) | 4(2, 8) | 6(2, 9) | 0.020 |
| HAMD score, median (IQR) | 4(2, 8) | 8(5, 12) | 3(2, 5) | 9(6, 12) | 0.000 |
| PSD, n (%) | 14(16.9) | 34(30.1) | 27(48.2) | 38(71.7) | 0.000 |

**Abbreviations:** PSD, post-stroke depression; BMI, body mass index; IQR, interquartile range; FBG, fasting blood glucose; HOMA-IR, Homeostatic Model Assessment of Insulin Resistance; Hs-CRP, High-sensitivity C-reactive protein; HCY, homocysteine; FT3, free tetraiodothyronine; TC, total cholesterol; TG, triglyceride; HDL-C, high-density lipoprotein cholesterol; LDL-C, low-density lipoprotein cholesterol; IL-1β, interleukin-1β; NIHSS, National Institutes of Health Stroke Scale; BI, Barthel Index; mRS, modified Rankin Scale; MMSE, Mini-Mental State Examination; HAMA, Hamilton Anxiety Scale; HAMD, Hamilton Depression Scale.
